# Supplementary material for: Sponge-like NiCo2O4/MnO2 ultrathin nanoflakes for supercapacitor with high-rate performance and ultra-long cycle life
Source: Royal Society of Chemistry journal article supplement (doi:10.1039/c4ta01337a), 2014-01-01
Supplement: c4ta01337a1.pdf [file c4ta01337a1.pdf]

## Electronic Supplementary Information (ESI)

### **Sponge-like NiCo<sub>2</sub>O<sub>4</sub>/MnO<sub>2</sub> ultrathin nanoflakes for supercapacitor with high-rate performance and ultra-long cycle life**

**Gao Li,<sup>‡</sup> Wenyao Li,<sup>‡</sup> Kaibing Xu, Rujia Zou\*, Zhigang Chen, Junqing Hu\***

State Key Laboratory for Modification of Chemical Fibers and Polymer Materials, College of Materials Science and Engineering, Donghua University, Shanghai 201620, China

\* Electronic mail: rjzou@dhu.edu.cn; hu.junqing@dhu.edu.cn

<sup>‡</sup> These authors contributed equally to the work

#### **Experimental**

##### **1. Synthesis of sponge-like NiCo<sub>2</sub>O<sub>4</sub>/MnO<sub>2</sub> ultrathin nanoflakes**

All chemicals used in the experiment were analytical grade. Graphite papers acted as current collector were first cut into a size of 10 mm × 40 mm, then pretreated with acetone and deionized water, each for 5 min sonicleaning, to ensure its surface was well cleaned. Then the graphite paper with a part left as working electrode for electrodeposition was put in a homogeneous solution containing 7 ml 0.05 M Co(NO<sub>3</sub>)<sub>2</sub>, 7 ml 0.05 M Ni(NO<sub>3</sub>)<sub>2</sub>, 7 ml 0.05 M Mn(NO<sub>3</sub>)<sub>2</sub> and 1 ml dimethylsulfoxide. The electrodeposition was performed in a glass cell consisting of the clean graphite paper working electrode, a graphite counter electrode and Ag/AgCl reference electrode at room temperature. The electrodeposition potential was set at -1.0 V (vs. Ag/AgCl) with an Autolab electrochemical workstation (PGSTAT302N). After electrodeposition, the graphite paper with product was carefully rinsed with deionized water and finally dried in air. Finally, the sample was put in a quartz tube and annealed at 250 °C for 2 h with a ramping rate of 1 °C min<sup>-1</sup>. In average, after annealing, the loading mass is about 0.55, 0.86, 1.29 mg cm<sup>-2</sup> for 20, 30, 40 min of electrodeposition, respectively.

##### **2. Characterization**

As-prepared products were characterized with a D/Max-2550 PC X-ray diffractometer (XRD; Rigaku, Cu-K $\alpha$  radiation), a scanning electron microscope (SEM; S-4800), a transmission electron microscope (TEM; JEM-2010F) equipped with an energy dispersive X-ray spectrometer (EDS), and an X-ray photoelectron spectroscopy (XPS; ESCALab250). The mass of the electrode

materials was weighed on an XS analytical balance (Mettler Toledo;  $\delta= 0.01$  mg).

### 3. Electrochemical characterization

Electrochemical measurements were performed on an Autolab Electrochemical Workstation (PGSTAT302N) using a three-electrode mode in 1 M KOH as the electrolyte at room temperature. The graphite paper supported multi-component composite acted directly as the working electrode. A Pt plate and Ag/AgCl were used as the counter electrode and the reference electrode, respectively. All potentials were referred to the reference electrode. The specific capacitance [ $F\ g^{-1}$ ] and current density [ $A\ g^{-1}$ ] were calculated based on the mass of materials.

The specific capacitance of the electrode is calculated from the CV curves according to the following equation:

$$C = \frac{Q}{\Delta V \cdot m}$$

where  $C$  ( $F/g$ ) is the specific capacitance,  $m$  ( $g$ ) is the mass of the active material on the electrode,  $Q$  ( $C$ ) is an average charge during charge and discharge process, and  $\Delta V$  ( $V$ ) is the potential window.

The galvanostatic charge-discharge (CD) capacitance is calculated from the discharge curves using the following equation.

$$C = \frac{I \cdot \Delta t}{\Delta V \cdot m}$$

where  $I$  ( $A$ ),  $\Delta t$  ( $s$ ),  $m$  ( $g$ ), and  $\Delta V$  ( $V$ ) are the discharge current, discharge time consumed in the potential range of  $\Delta V$ , mass of the active material, and the potential windows, respectively.

The energy density and power density are calculated using the following equations, respectively:

$$E = \frac{1}{2} C \cdot \Delta V^2$$

$$P = \frac{E}{\Delta t}$$

where  $E$  ( $Wh/kg$ ) is the energy density,  $P$  ( $kW/kg$ ) is the power density,  $C$  ( $F/g$ ) is the capacitance,  $\Delta V$  ( $V$ ) is the cell potential and  $\Delta t$  ( $s$ ) is the discharge time consumed in the potential range of  $\Delta V$ .

## Supplementary Figures

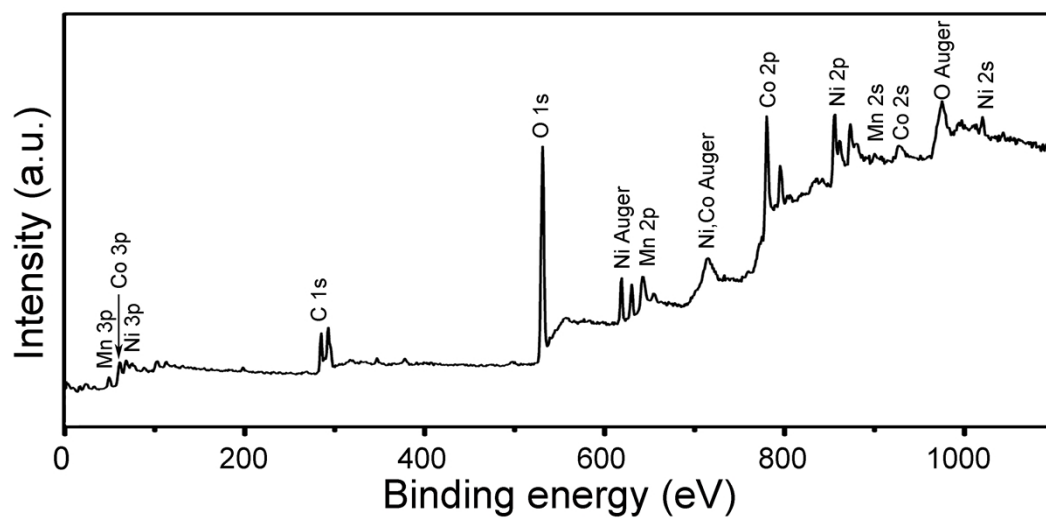

Fig. S1 XPS spectrum of sponge-like ultrathin nanoflakes.

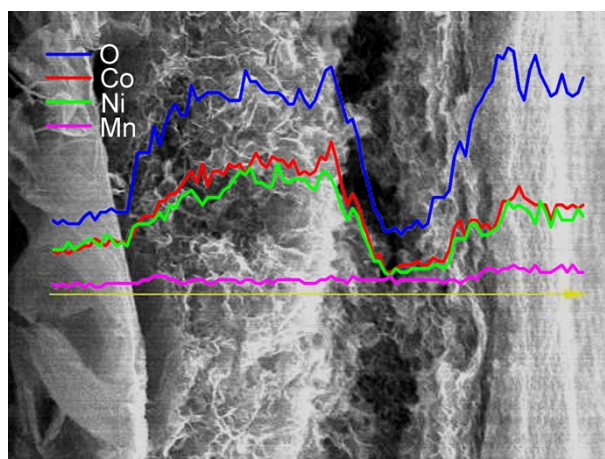

Fig. S2 Line-scanning of sponge-like ultrathin nanoflakes.

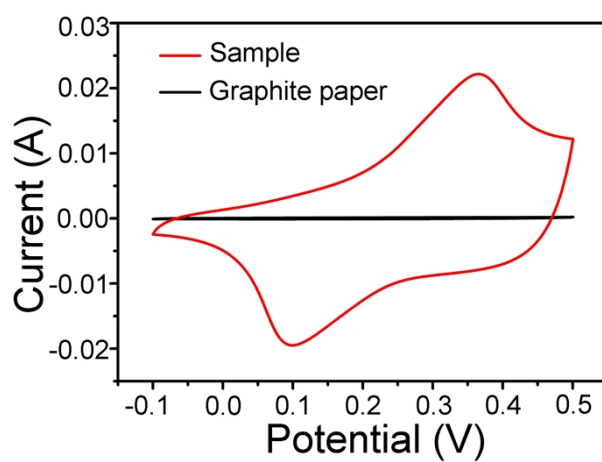

Fig. S3 CV curve of the graphite paper substrate compared with the ultrathin nanoflakes sample at

a scan rate of  $20 \text{ mV s}^{-1}$ .

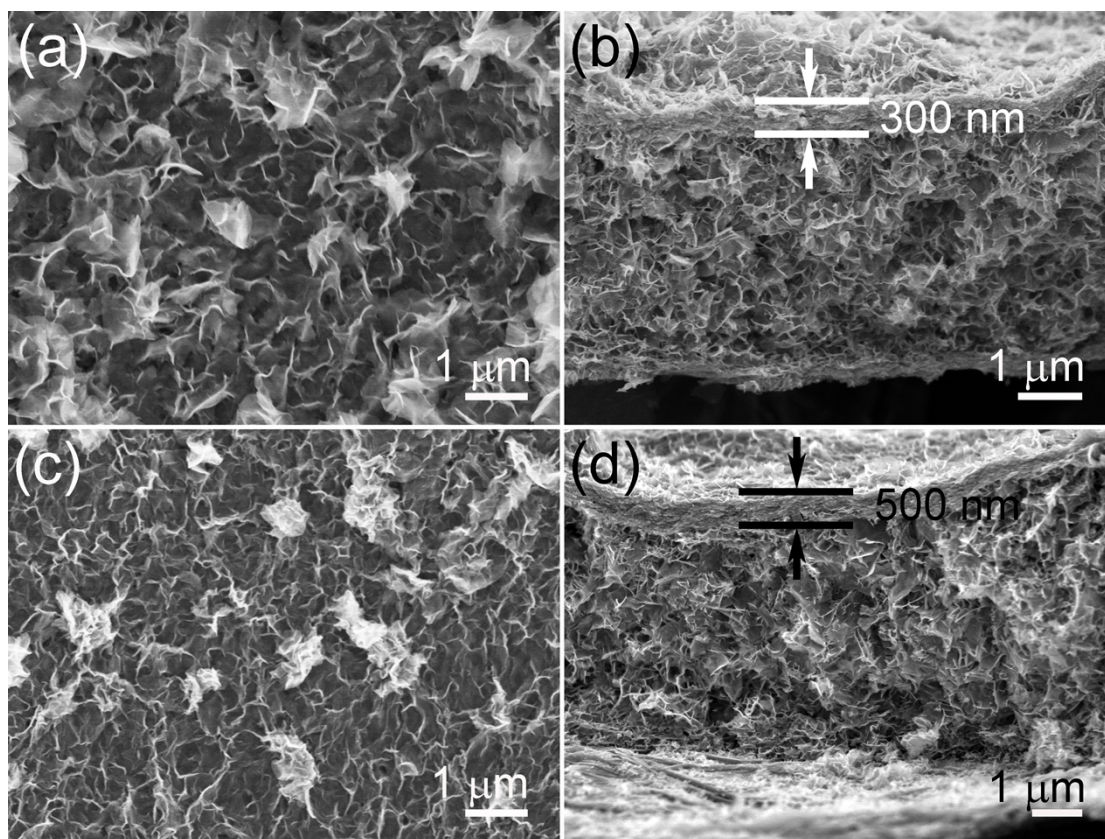

**Fig. S4** (a,b) FESEM image of the top view and side view of as-synthesized electrode with 30 min of electrodeposition, respectively. (c,d) FESEM image of the top view and side view of as-synthesized electrode with 40 min electrodeposition, respectively.

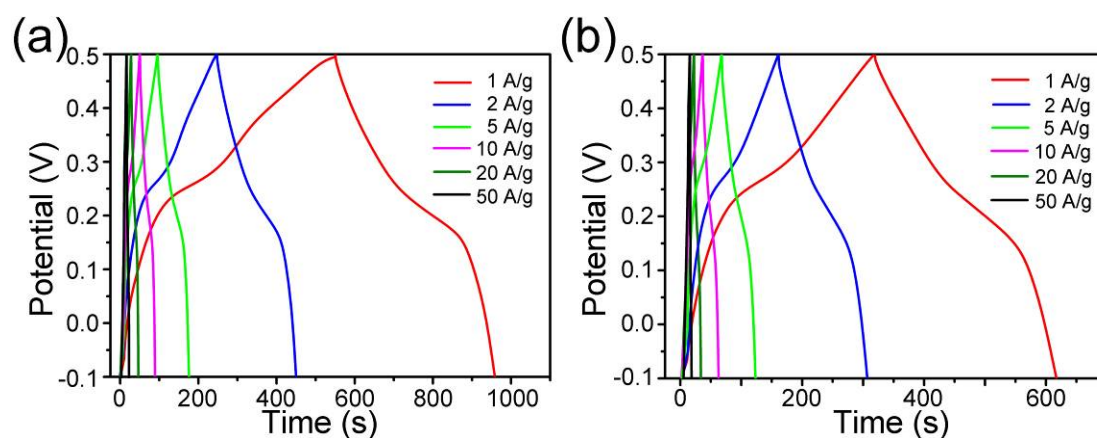

**Fig. S5** Galvanostatic charge-discharge curves of the as-synthesized electrode with (a) 30 min and (b) 40 min electrochemical deposition at different current densities.

**Table. S1** Specific capacitance values of the P2 and P3 samples.

| Current<br>(A g <sup>-1</sup> ) | 1   | 2   | 5   | 10  | 20  | 30  | 40  | 50  |
|---------------------------------|-----|-----|-----|-----|-----|-----|-----|-----|
| P2 (F g <sup>-1</sup> )         | 681 | 676 | 668 | 651 | 626 | 600 | 580 | 558 |
| P3 (F g <sup>-1</sup> )         | 496 | 487 | 465 | 438 | 390 | 345 | 306 | 266 |

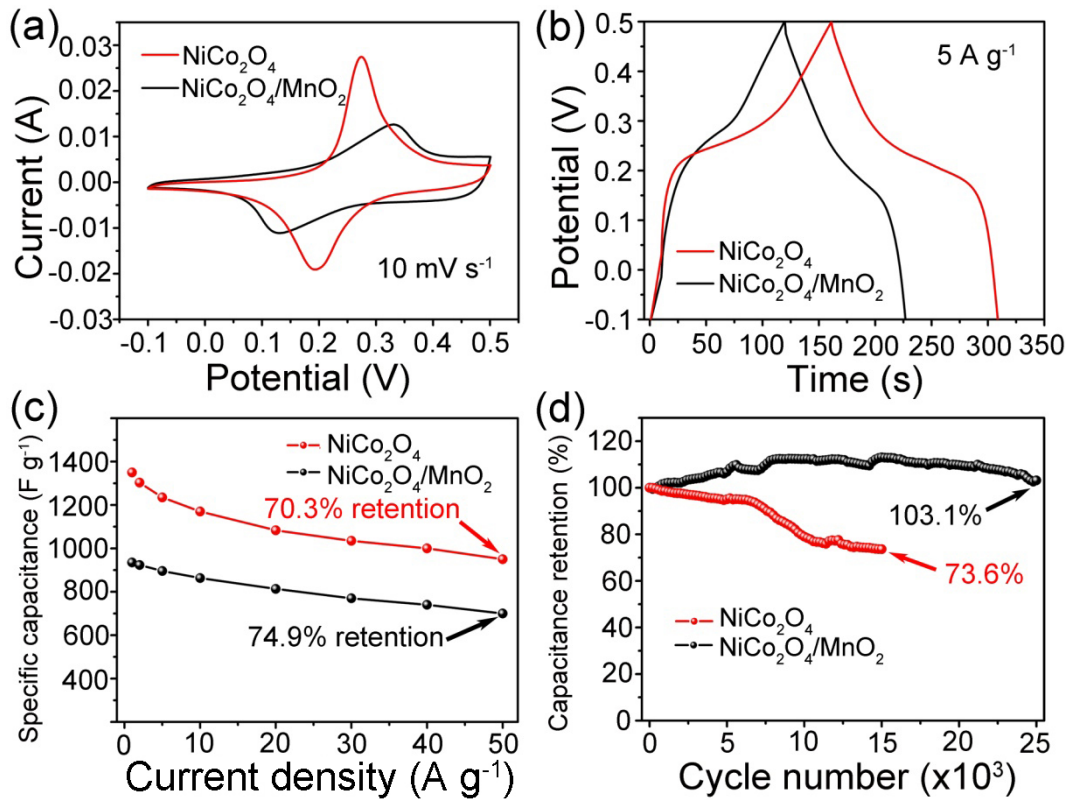

**Fig. S6** (a) CV and (b) CD curves of NiCo<sub>2</sub>O<sub>4</sub>/MnO<sub>2</sub> and pure NiCo<sub>2</sub>O<sub>4</sub>. (c) Specific capacitance as a function of the current density of NiCo<sub>2</sub>O<sub>4</sub>/MnO<sub>2</sub> and pure NiCo<sub>2</sub>O<sub>4</sub>. (d) Cycling performance of NiCo<sub>2</sub>O<sub>4</sub>/MnO<sub>2</sub> and pure NiCo<sub>2</sub>O<sub>4</sub> at a scan rate of 50 mV s<sup>-1</sup>.
